# Supplementary material for: Mapping the Dynamics of the Glucocorticoid Receptor within the Nuclear Landscape
Source: PubMed Central journal article supplement (PMC5524710; doi:10.1038/s41598-017-06676-0), 2017-07-24
Supplement: 41598_2017_6676_MOESM1_ESM.pdf [file 41598_2017_6676_MOESM1_ESM.pdf]

# **Supplementary Information**

## **Mapping the Dynamics of the Glucocorticoid Receptor within the Nuclear Landscape**

Martin Stortz, Diego M. Presman, Luciana Bruno, Paolo Annibale, Maria V. Dansey, Gerardo Burton, Enrico Gratton, Adali Pecci\* and Valeria Levi\*

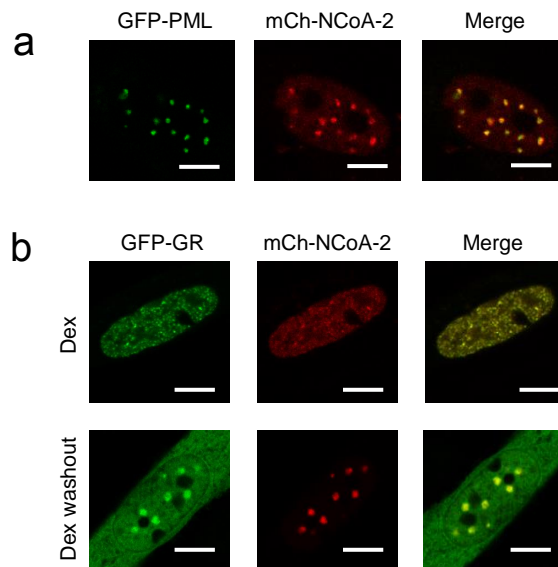

### Supplementary Figure S1

**Characterization of NCoA-2 bodies.** (a) Representative images of a BHK cell co-expressing GFP-PML(I) and mCherry-NCOA-2 (Scale bar: 5 μm). (b) Representative images of BHK cells co-expressing GFP-GR and mCherryNCOA-2 and stimulated 1 h with Dex (top panels). After this incubation, cells were washed with PBS and incubated in Dex-free medium for 20 h (bottom panels) (Scale bar: 5 μm).

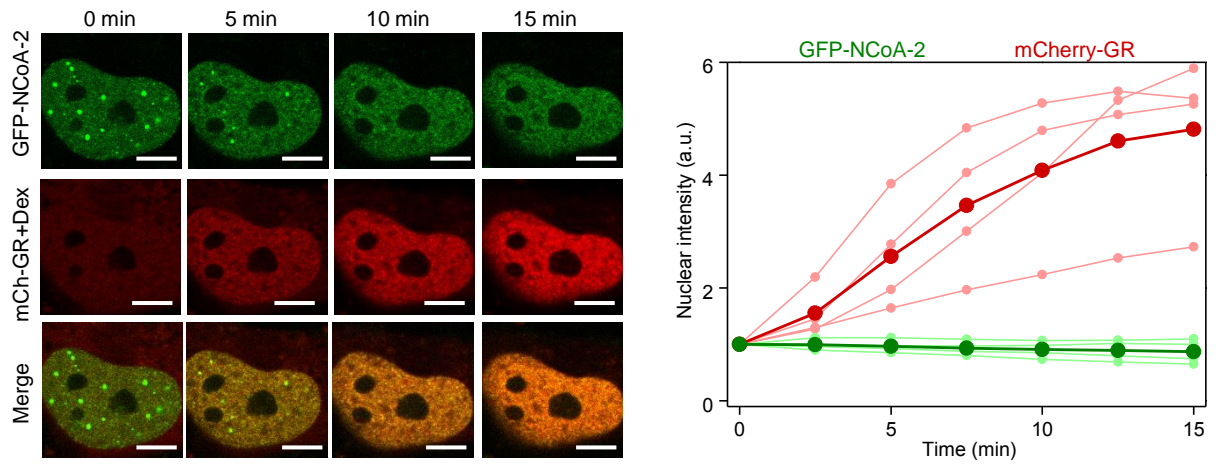

### Supplementary Figure S2

**Time-lapsed imaging of GR and NCoA-2 upon hormone addition.** Representative images of a BHK cell co-expressing GFP-NCoA-2 and mCherry-GR, during the first 15 min after Dex-stimulation (Scale bar: 5  $\mu$ m). Right panel shows the time evolution of the relative mean nuclear intensity of GFP-NCoA-2 (green lines) and mCherry-GR (red lines). Light curves represent single-cell values, while dark curves represent mean values.

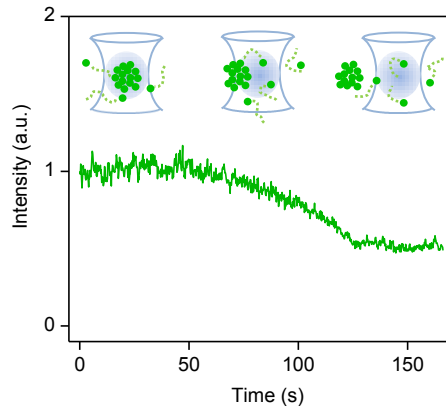

### Supplementary Figure S3

**GR focus motion during single-point FCS measurements.** Relative fluorescence intensity time-trace from a single-point FCS measurement performed on a focus in Dex-stimulated BHK cells expressing GFP-GR.

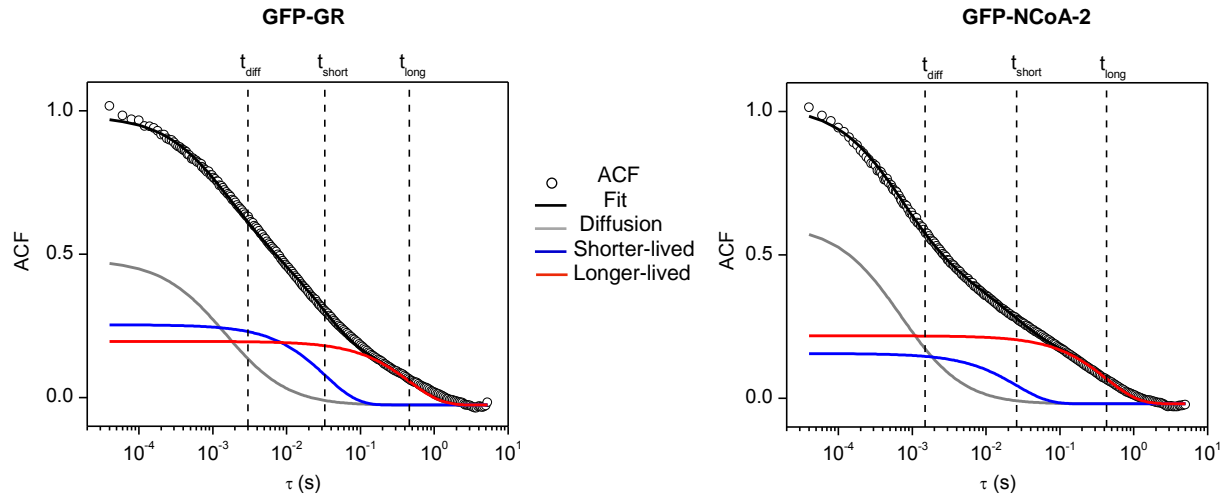

### Supplementary Figure S4

**FCS analysis of GR and NCoA-2 dynamics in the nucleus.** Average ACF data of GFP-GR (left panel) or GFP-NCoA-2 (right panel) in cells stimulated with Dex fitted with a model considering diffusion and binding to fixed targets with different residence times (continuous lines). The dashed vertical lines show the characteristic diffusion time and the residence times at shorter-lived and longer-lived sites.

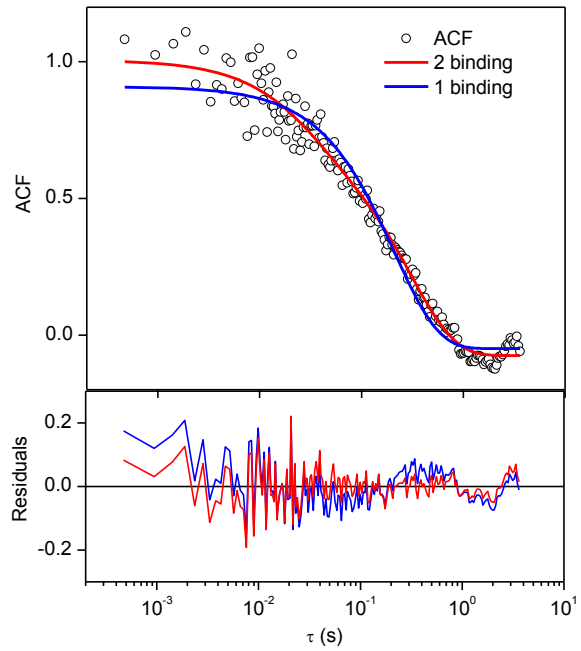

### Supplementary Figure S5

**GR dynamics at the MMTV-array.** The average ACF data of GFP-GR in 3617 cells stimulated with Dex obtained from line-scanning FCS experiments on the MMTV-array was fitted with a model considering a single or two populations of fixed binding sites.

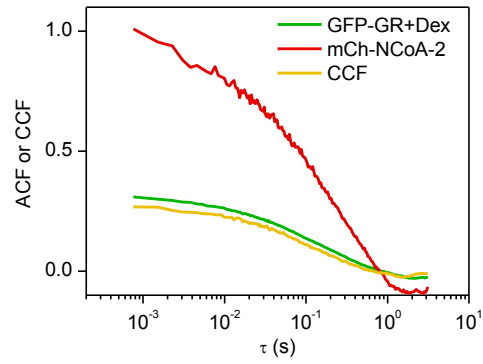

### Supplementary Figure S6

**ACFs and CCF analysis of GR and NCoA-2 on the MMTV-array.** Average ACF and CCF data of GFP-GR and mCherry-NCoA-2 in 3617 cells stimulated with Dex. The data were normalized to the ACF amplitude of mCherry-NCoA-2.

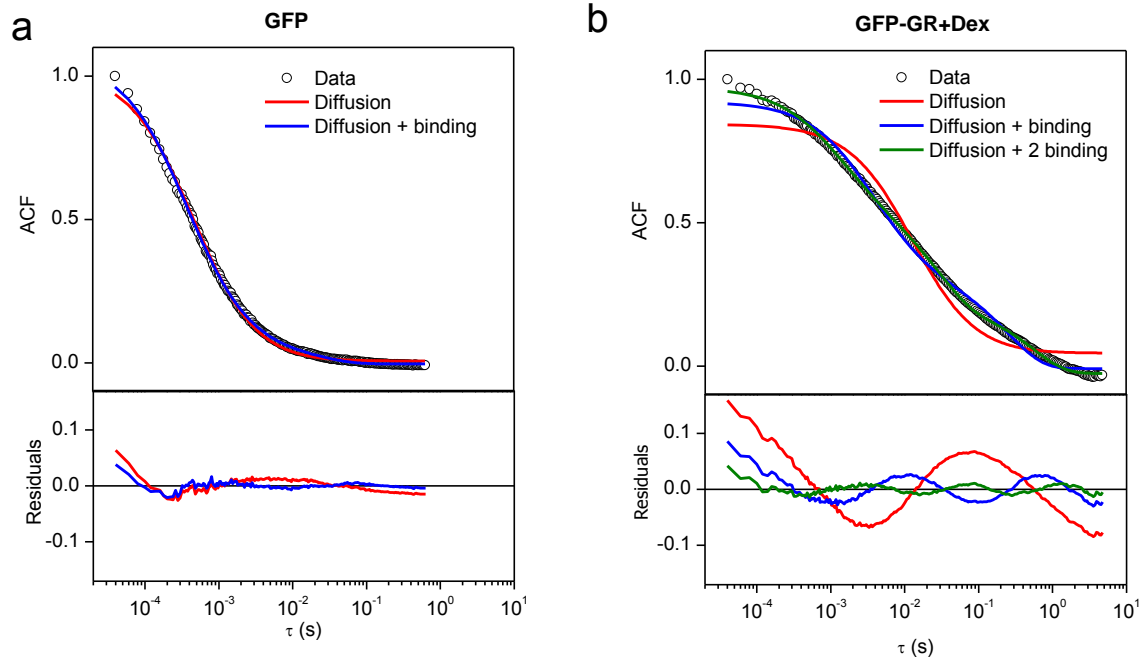

### Supplementary Figure S7

**GFP and GR-GFP mobility in the nucleus.** Average ACF data of GFP **(a)** or GFP-GR activated by Dex **(b)** in the nucleus of BHK cells was fitted with models that considers Brownian diffusion (red lines) or diffusion and binding to a single (blue lines) or two (green line) populations of binding sites.



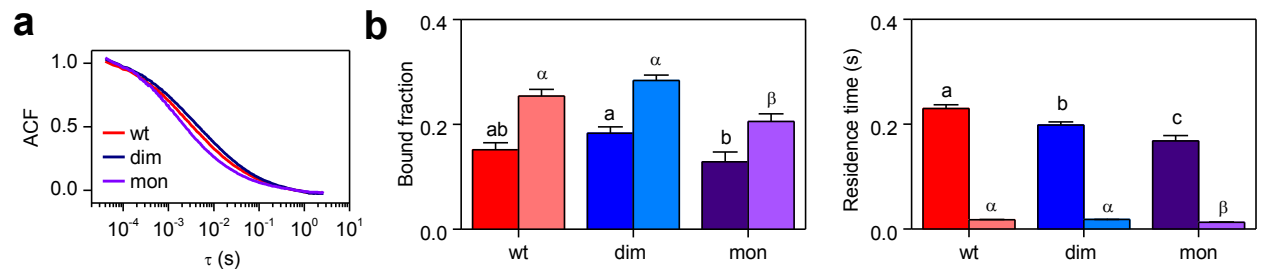

### Supplementary Figure S8

#### Fluorescence correlation spectroscopy analysis of GR dynamics in control cells.

**(a)** Average normalized ACFs of the receptor (wild type, GRdim or GRmon) fused to GFP in non-stimulated BHK cells. **(b)** Parameters obtained by fitting equation (2) corresponding to the short-lived (light colors) and long-lived (dark colors) components ( $22 \leq n \leq 32$ ). Bars corresponding to the same variable with different superscript letters are significantly different from each other ( $p < 0.05$ ).

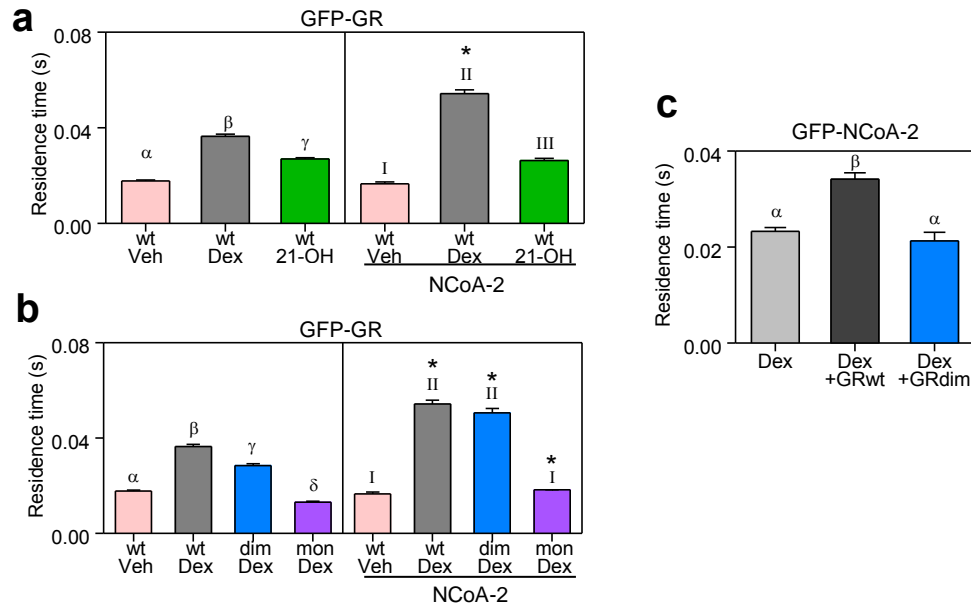

### Supplementary Figure S9

**Residence times of GR and NCoA-2 at shorter-lived sites.** Single-point FCS measurements were run in the nucleoplasm of BHK living cells expressing GFP fused to **(a-b)** the wild type GR, GRdim or GRmon and treated with Dex, 21-OH or vehicle (Veh), in the absence or presence of mCherry-NCoA-2, or **(c)** NCoA-2 and treated with Dex, in the absence or presence of mCherry-GR or mCherry-GRdim. **(a-c)** Residence times of the short-lived component were obtained by fitting equation (2) ( $22 < n < 43$ ). **(a-b)** Asterisks (\*) indicate the residence time significantly differs due to mCherry-NCoA-2 overexpression ( $p < 0.05$ ). Greek letters ( $\alpha$ ,  $\beta$ ,  $\gamma$ ,  $\delta$ ) or Roman numbers (I, II, III) indicate significant differences in the residence time measured in the absence or presence of mCherry-NCoA-2, respectively ( $p < 0.05$ ). **(c)** Bars with different superscript letters are significantly different from each other ( $p < 0.05$ ).
